# Supplementary material for: Evapolectrics: Direct Harvesting of Electricity from Evaporation
Source: Research Square preprint supplement (doi:10.21203/rs.3.rs-4835957/v1), 2024-08-02
Supplement: Supplementary file 1 [file 469000c5c3677b23dbd33428.docx]

Supplementary Information for

**Evapolectrics: Direct Harvesting of Electricity from Evaporation**

Jing Cao1,2✉, Jinfeng Dong3, Jing Wu4, Ady Suwardi5✉

1Institute of Materials Research and Engineering, Agency for Science, Technology and Research; 2 Fusionopolis Way, 138634, Singapore.

2Department of Materials Science and Engineering, National University of Singapore 117574, Singapore, Singapore.

3School of Materials Science and Engineering, Nanyang Technological University; 50 Nanyang Ave, 639798, Singapore.

4School of Electronic Science & Engineering, Southeast University; Nanjing, 211189, China.

5Department of Electronic Engineering, The Chinese University of Hong Kong; Sha Tin, New Territories, Hong Kong SAR, 999077, Hong Kong.

Corresponding authors: Jing Cao, [cao_jing@imre.a-star.edu.sg](mailto:cao_jing@imre.a-star.edu.sg); Ady Suwardi, [adysuwardi@cuhk.edu.hk](mailto:adysuwardi@cuhk.edu.hk)

Heat flow equation

Neglecting heat loss through the thickness direction of the evapolectric, the heat transfer through the TEG modules can be treated as quasi 1 dimensional, as shown in Fig. 1B. The fundamental driving force to create ΔT across TEG in this case is evaporation, which takes away heat:

where and represents evaporation heat flux (W, negative sign), latent heat of vaporization (J/Kg), and evaporation rate (Kg/s), respectively.

The evaporation from the heat sink will leave behind temperature depression (negative ΔT), resulting in the cold side heat sink with temperature T2 < Tair. However, as T2 < Tair, naturally the system will try to reach thermal equilibrium with the surrounding air:

where and represents heat gain from the environment (W, positive sign), and heat exchange coefficient with the environment (W/m2K). It is noteworthy that under ideal condition where there is no other heat exchange, the equilibrium between equation S1 and S2 will lead to a defined as wet-bulb depression, where Tair is the dry-bulb temperature, and T2 is the wet-bulb temperature. For instance, under lower relative humidity (RH), will be higher (as defined by equation (1) in the main text, leading to a lower T2 (wet-bulb temperature). Vice-versa is true.

In actual experiment, since the thermal conductivity of TEG modules are non-zero, quasi 1 dimensional heat will transfer from hot-side heat sink to cold side heat sink through the TEG modules:

where , and *t* represents effective thermal conductivity of TEG modules (W/mK), effective cross sectional area of TEG (m2), and thickness of the TEG (m). Intuitively from equation S3, one can deduce that lower thermal conductivity of TEG modules or thicker module will be helpful to maintain high *ΔT* (*T1-T2*) through the TEG. Lastly, it is worth adding that due to heat flow from hot side to cold side heat sink, *T­*1 is actually lower than *T*air. Hence, there exist heat absorption at hot side heat sink defined as:

It is noteworthy that the presence of wind serves to increase the heat exchange coefficient (*h*), leading to lower .

Effect of wind on water evaporation rate

There are many body of literatures on the effect of wind on evaporation rate, each depending on the specific applications. In the main text, we used equation (1), which consists of two terms to account for evaporation rate per unit surface area (kg/m2s):

Equation S5 was adopted from 1, which accounts for evaporation rate driven fully by energy input (*Q*in) from light absorption. In other words, it does not account for natural evaporation even when there is 0 *Q*in. This equation applies well to most cases of solar-driven thermal evaporator as the evaporation rate are dominated by the large amount of energy inputs.

On the other hand, equation S6 was adopted from 2 based on Lewis and Whitman3, which only accounts for natural evaporation of water without energy input. In the current work, especially in Fig. 2D, the ΔTHS-Air (a proxy for evaporation rate) is initially a linear function of wind speed up to 2 m/s, consistent with equation S6. However, as wind speed increases beyond 2 m/s, additional convective heat transfer from the wind onto the colder surface of heat sink becomes important, and offset the cooling effect brought about by increase in evaporation rate. In addition, both (saturated content of water vapor in air, kg/kg) and (actual content of water vapor in air, kg/kg) are function of RH and Tdry-bulb, which are holistically captured by the psychrometric chart via wet-bulb depression (Twet-bulb). Therefore, the effect of wind on evaporation rate at different RH and Tdry-bulb may not be the same. This part is not within the scope of the current work.

Literature comparison assumptions

In Fig. 4C, the values for various literature comparisons with other ambient-energy harvesting technologies were derived from the following:

- Power density of Evapolectrics: total power/effective cross sectional area of thermoelectric material. The maximum total power was taken at 6.5 mW for 2.8m/s wind speed at 40% RH and 31℃. In terms of cross sectional area, each TES1-24125 modules consists of 241 pairs of n-type and p-type legs, each with lateral size of 0.9 mm x 0.9 mm. Therefore, total active area per each TEG module is 390.42 mm2. Since there are 4 TEG modules in an evapolectric, the total cross sectional area is 1561.68 mm2.
- Power density of indoor PV: from the literature value in 4, the record high efficiency of 30% for indoor PV was evident for OPV with 1.4 W/m2 irradiation power. This translates to approximately 0.48 W/m2 power generation.
- TEG body heat, PENG, and TENG: the estimated values were taken from literature data in 5. This number of power density is realistic considering average power output for a human body at rest is around 100 W, with total body surface area of 1.7 m2, which translates to 60 W/m2 heat flux available. However, low ΔT between human body and surrounding temperature is generally observed due to poor heat exchange or heat dissipation, and poor thermal contact between TEG device and human skin. The typical power conversion efficiency of < 0.1% is expected. In fact, 0.01 W/m2 is already an optimistic estimation considering the typical high performance wearable TEG has power density much lower than this value.6
- Hydrovoltaics: the record high power density in hydrovoltaics community to date is 0.0552 W/m2, which is approximately two orders of magnitude lower than evapolectrics. 7
- Radiative cooling: the record high energy harvesting based on temperature gradient created by radiative cooling was reported by Shanhui Fan’s group. Their recent state-of-the art value stands at over 0.1 W/m2, and is expected to increase as the field matures.

In Fig. 4E, the power requirement for powering various small and low power electronics were derived from:

- Bluetooth, Wi-Fi, LCD/OLED, ECD/e-ink: range of values were taken from a comprehensive review by Joseph Wang and co-workers.5
- Fitness tracker/smartband/smartwatch: data was taken by dividing battery capacity with the theoretical battery utilization time according to product specification. Power consumption from following products tested in Fig. 4D were estimated as follows:

1. Redmi smart band 2 = 210mAh/14 days @5V = 3.1 mW
2. Xiaomi smart band 7 pro = 235 mAh/12days @5V = 4.1 mW
3. Redmi watch 3 = 289 mAh/12days @5V = 5.0 mW

- Smarphone: power consumption data was obtained from a third party website: <https://www.dxomark.com/what-we-test-battery/>, which shows a range of 345 mW to 529 mW over a wide range of smartphones.

Fig. S1.

Comparison of open-circuit voltage (VOC) profiles between non-coated vs graphite-coated devices at different wind speed at Tdry-bulb 31℃ and RH 40%. Consistent with ΔT data in Fig.2, the VOC for graphite-coated is substantially higher than non-coated ones. In terms of wind speed effect, the highest VOC is notably observed at 2.8 m/s, which is slightly higher than the optimal wind speed for ΔT in Fig.2.

Fig. S2.

**Open-circuit voltage as a function of various wind-speed and time.** **(a)** Non-coated evapolectrics. **(b)** graphite-coated evapolectrics. **(c)** Comparison of VOC for non-coated vs graphite-coated evapolectrics at 2.8 m/s wind speed. **(d)** Maximum VOC at various wind speeds for both non-coated and graphite-coated evapolectrics.

Fig. S3.

Power output at impedance matching condition (Pmax) for non-coated evapolectrics at various wind speeds. (a) as a function of load resistance. (b) Pmax as the function of wind speeds.

Fig. S4.

Maximum VOC (at wind speed 2.8 m/s) as a function of all combinations of RH and Tdry-bulb in Fig. 4A. Highest VOC is achieved at the lowest range of RH and highest Tdry-bulb, which combines to provide high evaporation rate and high ΔT across TEGs. Notably, the effect of varying RH (red dotted lines) on VOC is more significant compared to the effect of changing Tdry-bulb (blue dotted lines). This attests to the central role of evaporation in creating robust ΔT.

Fig. S5.

Open-circuit voltage (VOC) at 80% relative humidity (RH) as a function of time and Tdry-bulb.

Fig. S6.

Open-circuit voltage (VOC) at 70% relative humidity (RH) as a function of time and Tdry-bulb.

Fig. S7.

Open-circuit voltage (VOC) at 60% relative humidity (RH) as a function of time and Tdry-bulb.

Fig. S8.

Open-circuit voltage (VOC) at 50% relative humidity (RH) as a function of time and Tdry-bulb.

Fig. S9.

Open-circuit voltage (VOC) at 40% relative humidity (RH) as a function of time and Tdry-bulb.

Fig. S10.

Open-circuit voltage (VOC) at 30% relative humidity (RH) as a function of time and Tdry-bulb.

Fig. S11.

Open-circuit voltage (VOC) at Tdry-bulb of 22 ℃ as a function of time and relative humidity (RH).

Fig. S12.

Open-circuit voltage (VOC) at Tdry-bulb of 25 ℃ as a function of time and relative humidity (RH).

Fig. S13.

Open-circuit voltage (VOC) at Tdry-bulb of 28 ℃ as a function of time and relative humidity (RH).

Fig. S14.

Open-circuit voltage (VOC) at Tdry-bulb of 28 ℃ as a function of time and relative humidity (RH).

Fig. S15.

Photo of evapolectric device. (a) 4 TEG modules were used in an evapolectric device. (b) TEG modules sandwiched between two perpendicularly aligned aluminum heat sinks.

Fig. S16.

Photo of graphite-coated evapolectric device and the microscopy of the graphite. (a) Front face of the graphite-coated heat sink (b) Thickness of the graphite coating under SEM. (c) Porous nature of the graphite coating.

Fig. S17.

Wetting angle of water on aluminum surface vs graphite surface, both showing slightly hydrophobic nature.

Fig. S18.

Schematic controlled environment setup for evapolectrics testing under different relative humidity and temperature.

Fig. S19.

7 x 7 array of evapolectrics devices, and the holder design process.

Fig. S20.

Physical dimension of the heat sink used throughout the evapolectrics experiments.

Table S1.

Experimental parameters and boundary conditions used in the CFD simulation.

| Parameter | Value |
| --- | --- |
| Dynamic viscosity (air) | 1.85508 x 10-5 Pa.s |
| Molecular weight (air) | 28.9664 Kg/KMol |
| Specific heat (air) | 1003.62 J/KgK |
| Dynamic viscosity (water vapor) | 1.26765 x 10-5 Pa.s |
| Molecular weight (water vapor) | 18.0153 Kg/Kmol |
| Heat of formation (water vapor) | -1.34234 x 107 J/kg |
| Specific heat (water vapor) | 1938.19 J/KgK |
| Density (water liquid) | 997.561 Kg/m3 |
| Dynamic Viscosity (water liquid) | 8.8871x10-4 Pa.s |
| Heat of formation (water liquid) | -1.5866 x 107 J/kg |
| Latent heat of vaporization (water liquid) | 2.4426 x 106 KJ/Kg |
| Molecular weight (water liquid) | 18.0153 Kg/Kmol |
| Specific heat (water liquid) | 4181.72 J/KgK |
| Thermal conductivity (water liquid) | 0.620271 W/m.K |
| Density (Aluminum) | 2700 Kg/m3 |
| Specific heat (Aluminum) | 900 J/KgK |
| Thermal conductivity (Aluminum) | 205 W/m.K |
| Thermal conductivity (TEG) | 1.5 W/m.K |
| Ambient temperature | 30 ℃ |
| Initial and ambient humidity | 50 % |
| Initial heat sink fins and water temperature | 30 ℃ |
| Initial water liquid film thicknesses | 41.67 µm (based on 2 ml uniform spreading of water). Also consistent with actual graphite thickness of 40 – 50 µm. |

Supplementary Video S1.

Computational fluid dynamics (CFD) simulation showing the time evolution of surrounding air temperature and front face heat sink temperature as the water evaporates. Wind direction and gravity orientation are indicated by respective arrows.

Supplementary Video S2.

Computational fluid dynamics (CFD) simulation showing the time evolution of mass-fraction of water in the surrounding air and at the front face heat sink as the water evaporates. Wind direction and gravity orientation are indicated by respective arrows.

Supplementary Video S3.

7 x 7 array of evapolectrics sprinkled with water showing enough power generated from evaporation to charge smartphone.

Supplementary Video S4.

Thermal imaging video showing the side by side comparison of time evolution of temperature between non-coated and graphite-coated heat sinks.

Supplementary Video S5.

Real-time LabVIEW video showing the data acquisition of VOC (open-circuit voltage) after water is introduced onto heat sink surface.

Supplementary Video S6.

Real-time LabVIEW video showing the output power vs load resistance after water is introduced onto heat sink surface.

**References**

1 Tu, Y. *et al.* Plausible photomolecular effect leading to water evaporation exceeding the thermal limit. *Proceedings of the National Academy of Sciences* **120**, e2312751120 (2023).

2 Akterian, S. Evaluating the vapour evaporation from the surface of pure organic solvents and their mixtures. *Food Science and Applied Biotechnology* **3**, 77-84 (2020).

3 Lewis, W. K. & Whitman, W. G. Principles of Gas Absorption. *Industrial & Engineering Chemistry* **16**, 1215-1220, doi:10.1021/ie50180a002 (1924).

4 Mathews, I., Kantareddy, S. N., Buonassisi, T. & Peters, I. M. Technology and market perspective for indoor photovoltaic cells. *Joule* **3**, 1415-1426 (2019).

5 Yin, L., Kim, K. N., Trifonov, A., Podhajny, T. & Wang, J. Designing wearable microgrids: towards autonomous sustainable on-body energy management. *Energy & Environmental Science* **15**, 82-101 (2022).

6 Xu, Q. *et al.* High-performance, flexible thermoelectric generator based on bulk materials. *Cell Reports Physical Science* **3** (2022).

7 Wang, H. *et al.* Bilayer of polyelectrolyte films for spontaneous power generation in air up to an integrated 1,000 V output. *Nature Nanotechnology* **16**, 811-819 (2021).
